# Supplementary material for: Dextran based pH-sensitive near-infrared nanoprobe for in vivo differential-absorption dual-wavelength photoacoustic imaging of tumors
Source: Royal Society of Chemistry journal article supplement (doi:10.1039/c2jm33990k), 2012-01-01

## **Dextran based pH-sensitive near-infrared nanoprobe for *in vivo* differential-absorption dual-wavelength photoacoustic imaging of tumor**

**Guojia Huang,<sup>a</sup> Zhan Si,<sup>b</sup> Sihua Yang,<sup>a</sup> Cong Li<sup>\*b</sup> and Da Xing<sup>\*a</sup>**

<sup>a</sup> *MOE Key Laboratory of Laser Life Science & Institute of Laser Life Science, College of Biophotonics, South China Normal University, Guangzhou 510631, China.*

*E-mail: xingda@scnu.edu.cn; Fax: +86-20-85216052; Tel: +86-20-85210089*

<sup>b</sup> *Key Laboratory of Smart Drug Delivery & PLA, School of Pharmacy, Fudan University, Shanghai 201203, China. E-mail: congli@fudan.edu.cn; Fax: +86 21 51980100; Tel: +86 21 5198010*

### **Supporting Information**

#### Table of content

1. Detailed Synthesis of **NP1**
2. Photoacoustic microscopy seystem (Fig. S1)
3. Cell viabilities (Fig. S2)
4. Absorbance of IR783 and rhodamine (Fig. S3)
5. Intracellular destination of **NP1** (Fig. S4)
6. Histological examination (Fig. S5)
7. Spectra

## Detailed Synthesis of NP1:

Nanoprobe **NP1** was prepared according to below synthetic procedure.

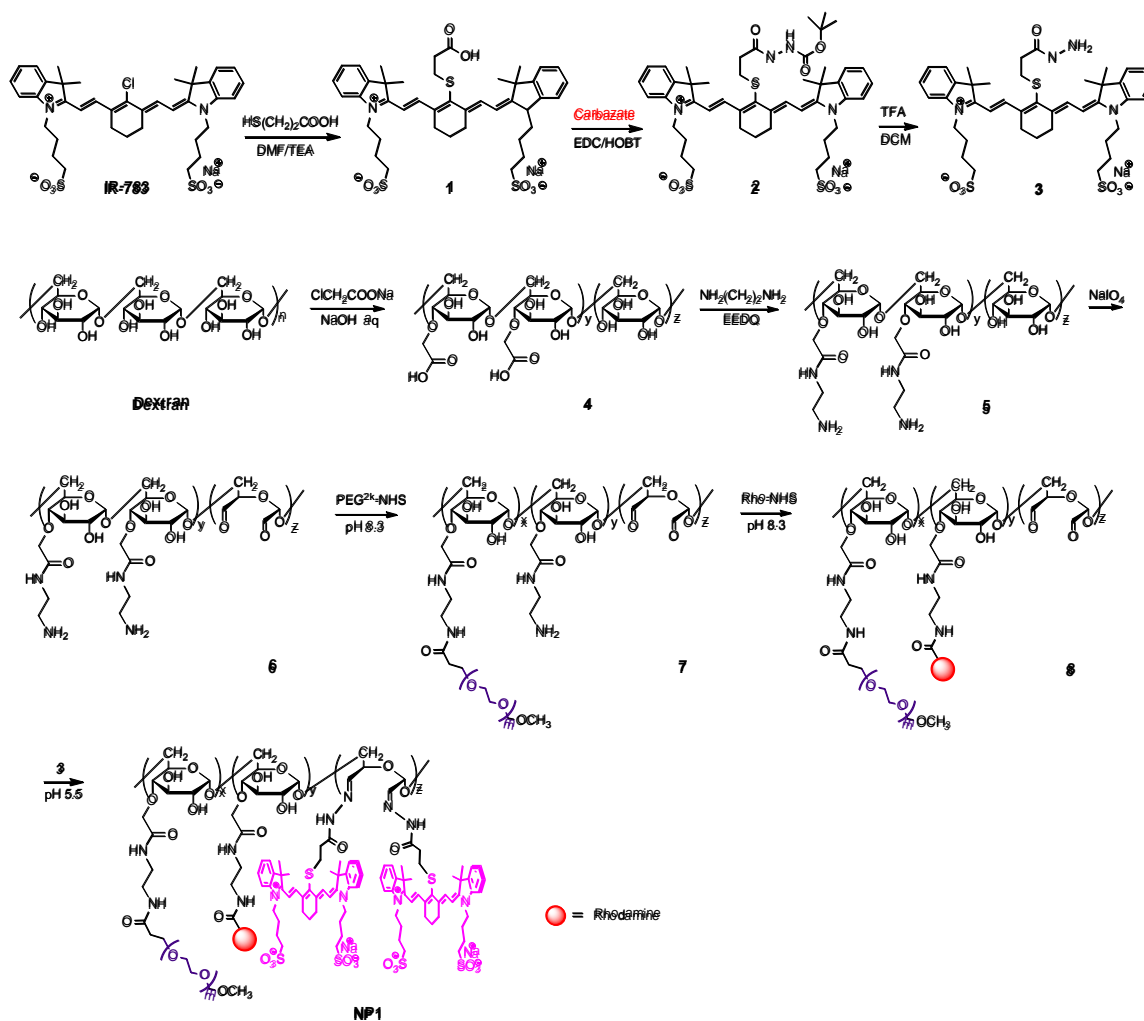

**Scheme S1** The detailed synthesis procedure of **NP1**.

**Preparation of compound 1.** To a solution of IR783 (100 mg,  $1.34 \times 10^{-4}$  mol) in 2 mL anhydrous DMF was added 3-mercaptopropionic acid (14  $\mu\text{L}$ , 17 mg,  $1.6 \times 10^{-4}$  mol, 1.2 equiv.) and triethylamine (22  $\mu\text{L}$ , 16 mg,  $1.6 \times 10^{-4}$  mol). The green color solution was allowed to stir in the dark at r.t. for 15 h. The crude product was precipitated by addition of excess diethyl ether

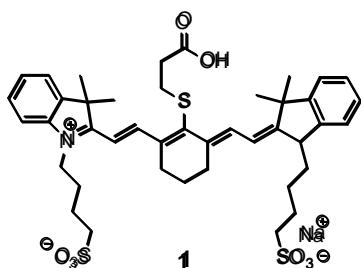

and further purified through gravity chromatography (silica gel, CH<sub>3</sub>CN:H<sub>2</sub>O = 100:10, V:V). The purified product dissolved in water was lyophilized as a deep green powder (yield: 82%,  $1.1 \times 10^{-4}$  mol, 90 mg). <sup>1</sup>H NMR (400 MHz, CD<sub>3</sub>OD): δ 8.70 (d, 2H, *J* = 14.0 Hz), 7.33 (d, 2H, *J* = 7.6 Hz), 7.27-7.23 (t, 2H, *J* = 7.2 Hz), 7.19 (d, 2H, *J* = 8.0 Hz), 7.11-7.07 (t, 2H, *J* = 7.2 Hz), 6.17 (d, 2H, *J* = 13.6 Hz), 4.05-4.02 (t, 4H, *J* = 6.4 Hz), 2.92-2.88 (t, 2H, *J* = 6.8 Hz), 2.77-2.73 (t, 4H, *J* = 6.8 Hz), 2.55-2.52 (t, 4H, *J* = 6.4 Hz), 2.44-2.41 (t, 2H, *J* = 7.2 Hz), 1.83-1.74 (m, 10H), 1.58 (s, 12H); <sup>13</sup>C NMR (100 MHz, CD<sub>3</sub>OD): 175.68 (C), 173.88 (2 × C), 157.91 (C), 147.23 (2 × C), 143.81 (2 × CH), 142.52 (2 × CH), 135.14 (2 × CH), 129.99 (2 × C), 126.32 (2 × C), 123.57 (2 × CH), 112.24 (2 × CH), 102.46 (2 × CH), 51.95 (2 × CH<sub>2</sub>), 50.57 (2 × CH<sub>2</sub>), 47.87 (2 × C), 36.19 (CH<sub>2</sub>), 34.20 (CH<sub>2</sub>), 28.54 (4 × CH<sub>3</sub>), 27.40 (2 × CH<sub>2</sub>), 27.34 (2 × CH<sub>2</sub>), 23.72 (2 × CH<sub>2</sub>), 22.30 (CH<sub>2</sub>); HRFAB-MS: C<sub>41</sub>H<sub>51</sub>O<sub>8</sub>N<sub>2</sub>S<sub>3</sub>Na [M+H]<sup>+</sup>, found 819.2794 (44.7%), calculated 819.2784.

**Preparation of compound 2.** Compound 1 (90 mg,  $1.1 \times 10^{-4}$  mol) was dissolved in dry DMF (0.5 mL) and cooled to 0 °C. EDC (25.3 mg,  $1.32 \times 10^{-4}$  mol), and HOBt (17.84 mg,  $1.32 \times 10^{-4}$  mol) were added to above solution as condensation agents. Tert-butyl carbazate (17.5 mg,  $1.32 \times 10^{-4}$  mol) was added and left to stir for 9 hours. The crude product was precipitated by addition of excess diethyl ether and purified through gravity chromatography (silica gel, CH<sub>2</sub>Cl<sub>2</sub>:CH<sub>3</sub>OH = 100:15~100:40

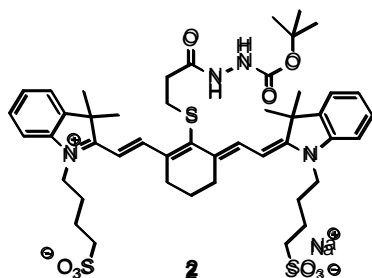

(V:V). The purified product dissolved in water was lyophilized as a deep green powder (yield: 70%, 67.5 mg). <sup>1</sup>H NMR (400 MHz, CD<sub>3</sub>OD) δ = 8.89 (d, *J*=14.2, 2H), 7.49 (d, *J*=7.4, 2H), 7.41 (t, *J*=7.3, 2H), 7.37 – 7.28 (m, 2H), 7.22 (dd, *J*=33.6, 26.3, 2H), 6.34 (d, *J*=14.2, 2H), 4.20 (t, *J*=6.9, 4H), 3.14 – 2.97 (m, 2H), 2.88 (dd, *J*=15.9, 9.0, 4H), 2.71 (s, 4H), 2.53 (t, *J*=7.5, 2H), 2.03 – 1.90 (m, 10H), 1.81 – 1.71 (m, 12H), 1.47 – 1.36 (m, 9H). <sup>13</sup>C NMR (101 MHz, MeOD) δ 172.585 (C), 171.355 (C), 159.653 (C), 156.178 (C), 156.178 (2 × C), 145.863 (2 × CH), 142.365 (C), 141.083 (2 × CH), 140.68 (2 × CH), 133.771 (2 × C), 128.451 (2 × C), 124.805 (2 × CH), 122.025 (2 × CH), 110.728 (2 × CH<sub>2</sub>), 100.994 (2 × CH<sub>2</sub>), 50.433 (2 × CH<sub>2</sub>), 49.143 (C), 43.548 (2 × C), 33.846 (CH<sub>2</sub>), 32.402 (CH<sub>2</sub>), 27.227 (3 × CH<sub>3</sub>), 27.128 (4 × CH<sub>3</sub>), 27.015 (2 × CH<sub>2</sub>), 25.898 (2 × CH<sub>2</sub>), 22.208 (2

$\times \text{CH}_2$ ), 20.804(CH<sub>2</sub>). FAB-MS: C<sub>46</sub>H<sub>6</sub>O<sub>9</sub>N<sub>4</sub>S<sub>3</sub>Na [M+Na]<sup>+</sup>, found 955.3, calculated 955.3.

Preparation of compound **3**. Compound **2** (33.7 mg,  $0.39 \times 10^{-4}$  mol) was dissolved in a mixture of DCM and TFA (1:1, V:V) and stirred at room temperature for 1 h. The solvent was removed under a vacuum and the residue was redissolved in distilled water. This product was used directly in the next step without further purification. FAB-MS: C<sub>41</sub>H<sub>53</sub>O<sub>7</sub>N<sub>4</sub>S<sub>3</sub>Na [M-Na+CF<sub>3</sub>COOH]<sup>+</sup>, found 925.8, calculated 925.4.

Preparation of compound **4**. Dextran (20 kDa, 400 mg,  $2.0 \times 10^{-5}$  mol) was dissolved in 8.25 mL of 6 M NaOH that was pre-cooled by an ice bath. Then 816 mg ( $7.0 \times 10^{-3}$  mol) chloroacetic acid sodium salt was added. Above mixture was stirred at 60 °C for 50 min and then cooled to room temperature. Then the polymer was precipitated by adding a large amount of ice-cold methanol. The product was filtered and dried under a vacuum to obtain a white color powder. (yield: 97%,  $1.90 \times 10^{-5}$  mol, 400 mg, MW is considered as 21 kDa).

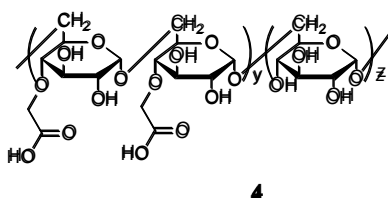

Preparation of compound **5**. 0.4 g compound **4** ( $3.1 \times 10^{-4}$  mol) was dissolved in 80 mL of water and the pH was adjusted to 3 with 1.0 M HCl. Then an EEDQ solution prepared with 616 mg ( $2.49 \times 10^{-3}$  mol) of EEDQ and 2 mL DMF was added dropwise. The resulting solution was added with 0.83 mL ( $3.33 \times 10^{-3}$  mol) ethylenediamine under stirring. After 4 h reaction, the dextran derivative was precipitated by adding a large amount of methanol. The product was dried under vacuum as a white powder. ( $1.71 \times 10^{-5}$  mol, 373 mg, MW is considered as 21.8 kDa yield: 90%).

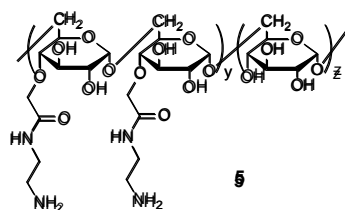

#### Preparation of compound 6.

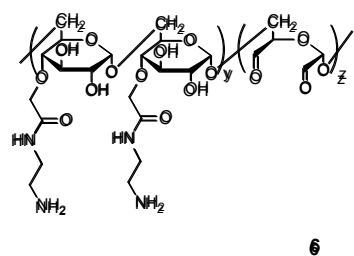

Compound **5** (21.8 kDa, 350 mg,  $1.61 \times 10^{-5}$  mol) dissolved in 20 mL pure water and  $\text{NaIO}_4$  (121 mg,  $5.64 \times 10^{-4}$  mol, 35 equiv.) was added as solid form. The mixture was stirred at r.t. for 24 h, and diethylene glycol (59.1 mg,  $5.64 \times 10^{-4}$  mol, 35 equiv.) was added to stop this reaction at the end of reaction. The product was purified in 3 kDa filter tube by washing with pure water for 3 times. The purified product was lyophilized as a white solid (233 mg,  $1.11 \times 10^{-5}$  mol, MW is considered as 21 kDa, yield: 69%).

#### Preparation of compound 7.

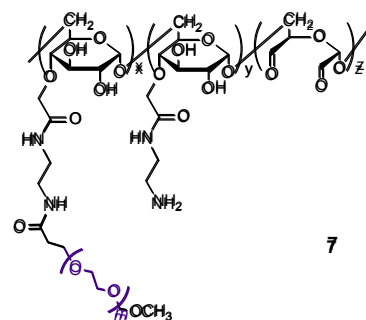

Compound **6** (21 kDa, 200 mg,  $9.5 \times 10^{-6}$  mol) was dissolved in 4 mL 0.1 M HEPES pH 8.3 and  $\text{PEG}^{2k}\text{-NHS}$  ( $4.75 \times 10^{-5}$  mol, 95 mg, 5 equiv.) in 200  $\mu\text{L}$  DMF was added. After reaction for 1.0 h, the product was purified in 3 kDa filter tube by 3  $\times$  pure water. The product was lyophilized as a cotton-like white solid (206.15 mg,  $6.65 \times 10^{-6}$  mol, MW is considered as 31 kDa, yield: 70%). The molar ratio between PEG and Dextran moieties in Dex-PEG conjugate was determined by quantifying the integrated proton number of  $\text{CH}_2$  in the

PEG  $\delta$  (3.67 ppm) and the integrated proton number of dextran at C1 position  $\delta$  (4.95 ppm) in the  $^1\text{H}$  NMR spectrum.

#### Preparation of compound 8.

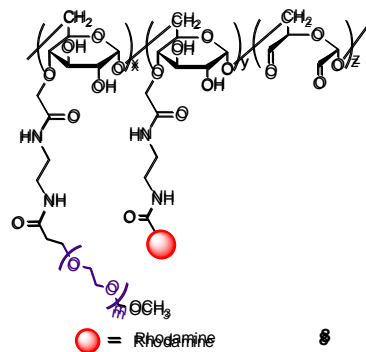

Compound **7** (31 kDa, 100.0 mg,  $3.23 \times 10^{-6}$  mol) was dissolved in 4 mL 0.1 M HEPES pH 8.3 and Rhodamine-NHS ester ( $0.645 \times 10^{-5}$  mol, 3.395 mg, 2 equiv) in 200  $\mu\text{L}$  DMF was added. After reaction for 1.0 h, the product was purified in 3 kDa filter tube by 3  $\times$  pure water. The product was lyophilized as a deep red color powder (31 kDa, 90.0 mg,  $2.9 \times 10^{-6}$  mol, yield: 90%).

Preparation of nanoprobe **NP1**. Compound **3** ( $33.7\text{ mg}$ ,  $3.9 \times 10^{-5}\text{ mol}$ ) in  $1.0\text{ mL}$  DMF was added to compound **8** ( $50\text{ mg}$ ,  $0.162 \times 10^{-7}\text{ mol}$ ) dissolved in  $5.0\text{ mL}$   $0.1\text{ M}$  MES buffer solution ( $\text{pH } 4.7$ ). After stirring at r.t. for  $16\text{ h}$ , the product was purified in  $10\text{ kDa}$  centrifugal filtration tube and lyophilized as a deep green color powder ( $50\text{ mg}$ ,  $0.125 \times 10^{-7}\text{ mol}$ , MW is considered as  $40\text{ kDa}$ , yield:  $77\%$ ). The fluorophore labeling efficacy in **NP1** was calculated as  $35\%$  ( $35\%$  of aldehyde moieties were labeled with NIR dye) by measuring the absorbance of IR783 ( $\epsilon_{783} = 180,000\text{ M}^{-1}\text{cm}^{-1}$ ).

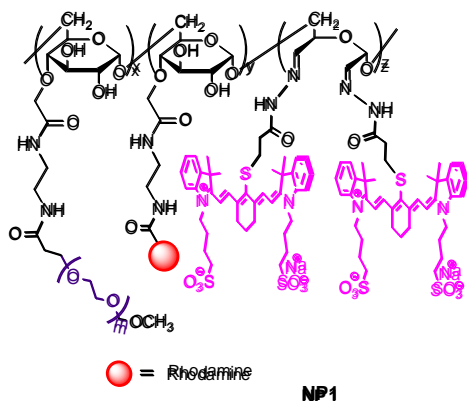

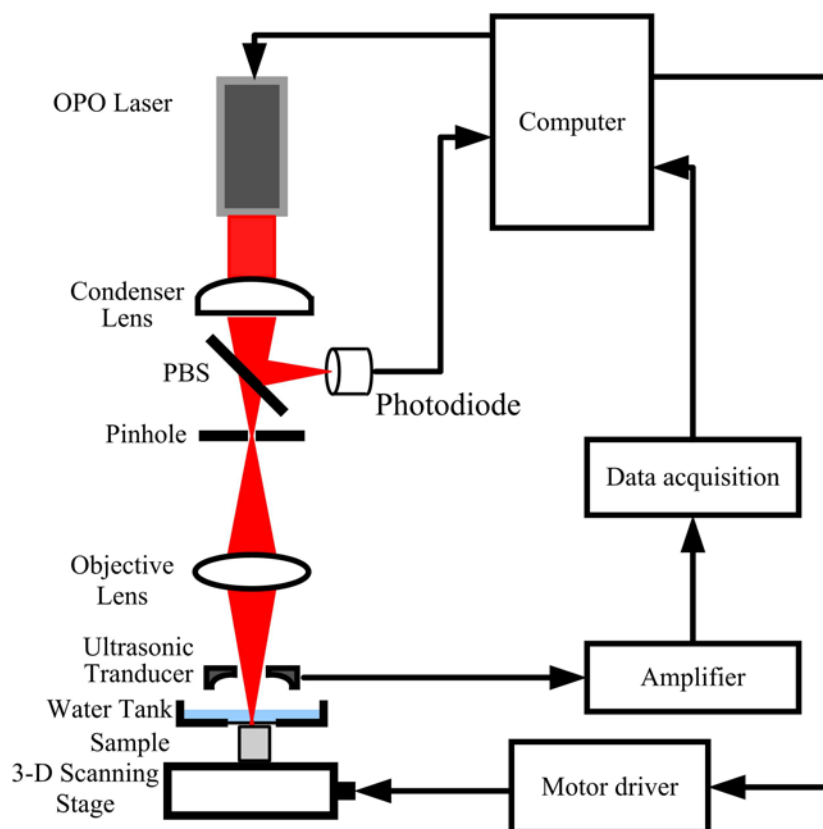

**Fig. S1** Schematic of the PAM system

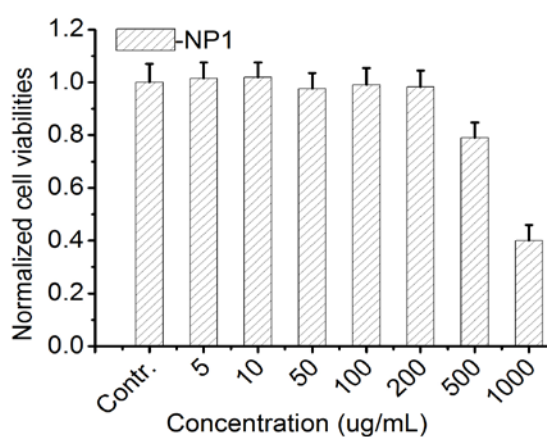

**Fig. S2** NP1 demonstrated low cytotoxicity in EMT-6 cancer cells.

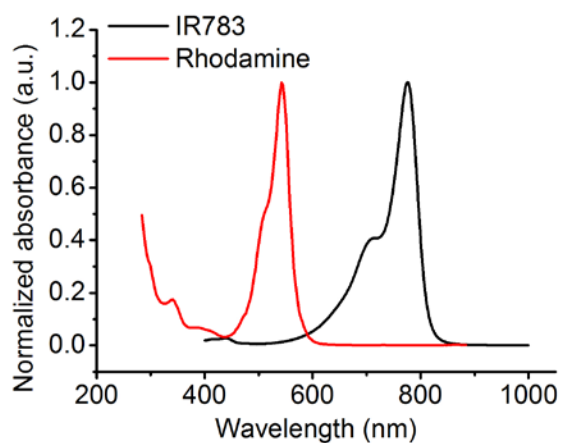

**Fig. S3** The absorbance of IR783 (black) and rhodamine (red).

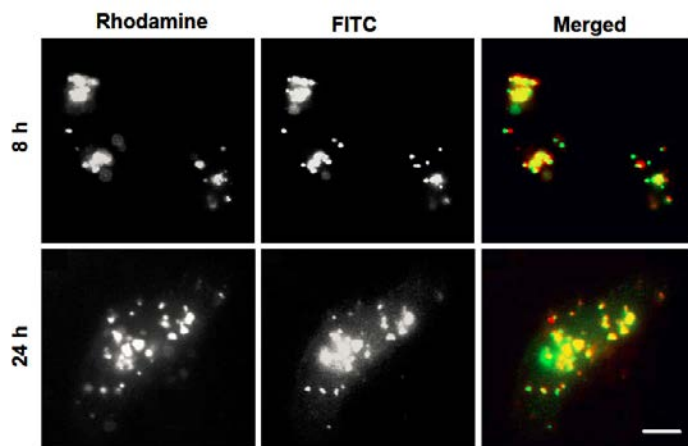

**Fig. S4** The lysosomal delivery of NP1 in live U87MG cancer cells. Scale bar, 20  $\mu\text{m}$ .

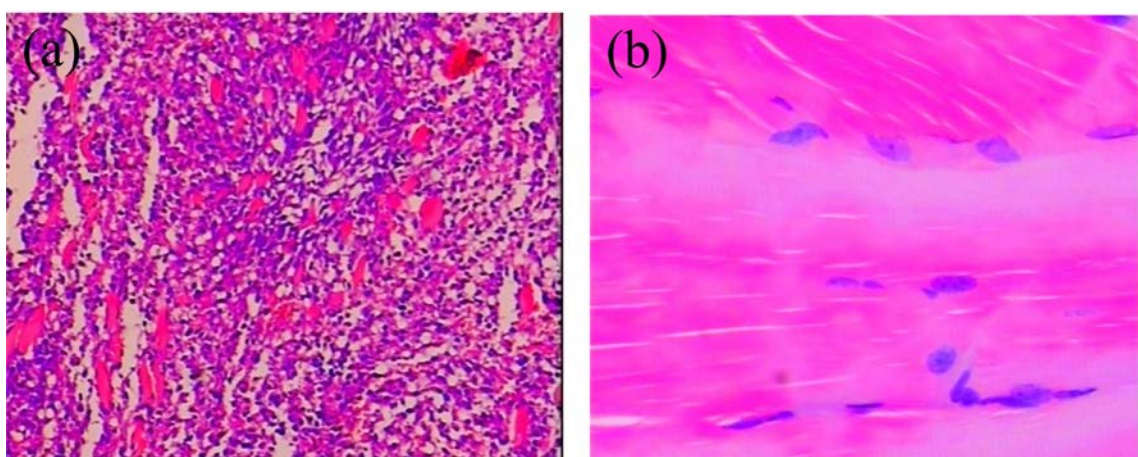

**Fig. S5** H&E stained histological section of tumor (a) and normal muscle tissue (b) as the circles indicated in Fig. 7(a).

## Spectra

$^1\text{H}$ ,  $^{13}\text{C}$  NMR spectra were recorded at 400 MHz on Varian Mercury400 (Varian Inc. Palo Alto, CA, USA), and chemical shifts were reported in ppm relative to tetramethylsilane. Fast Atom Bombardment (FAB) mass spectra and High Resolution (HR) FAB mass spectra were obtained on a double sector JEOL JMS-A X505HA mass spectrometer (Peabody, MA, USA).

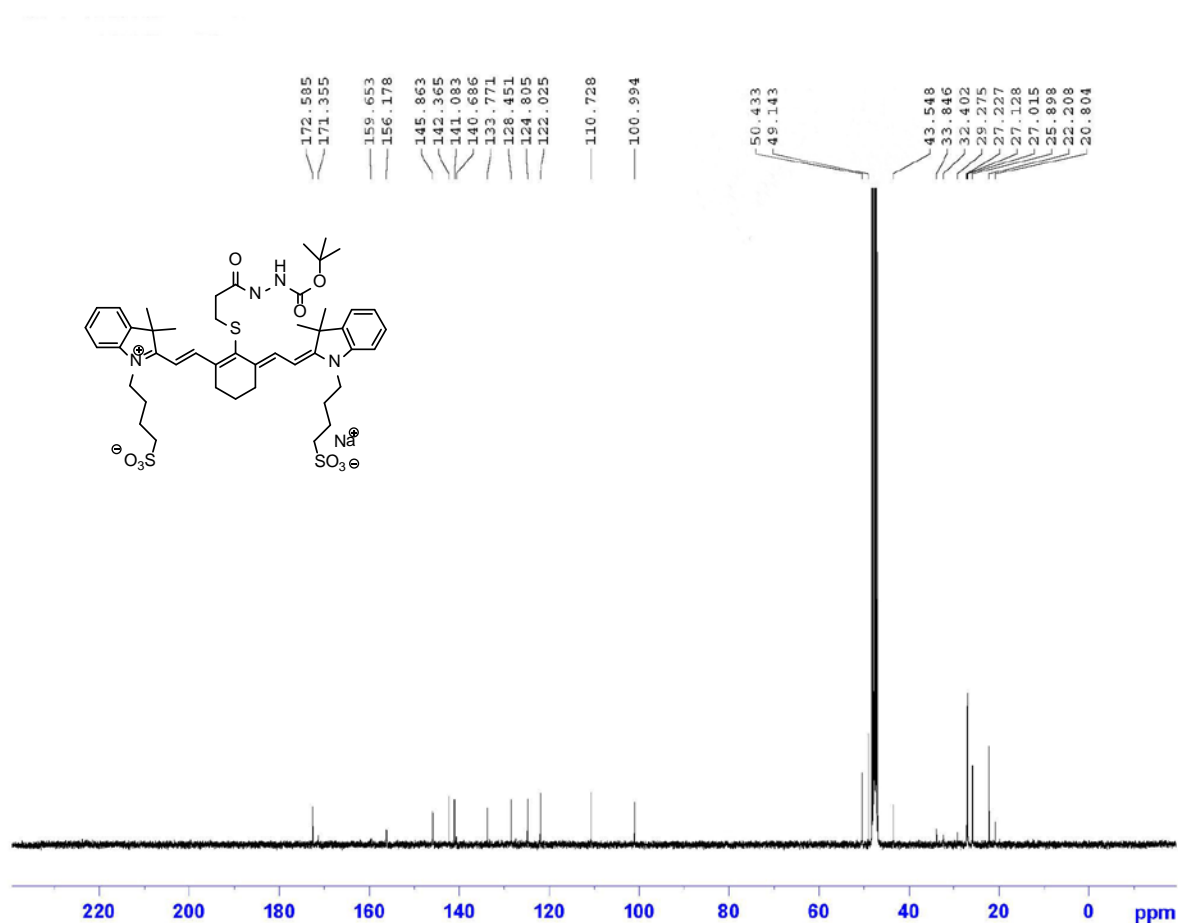

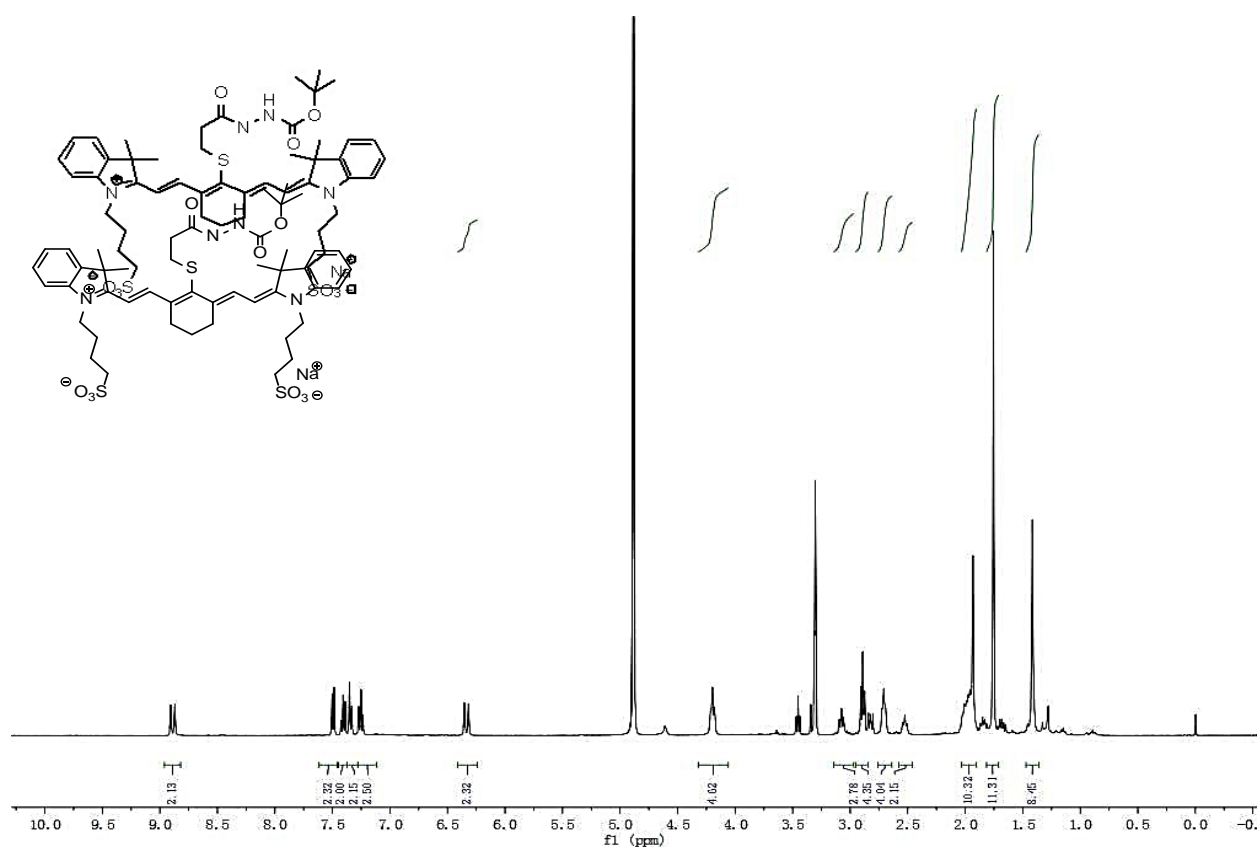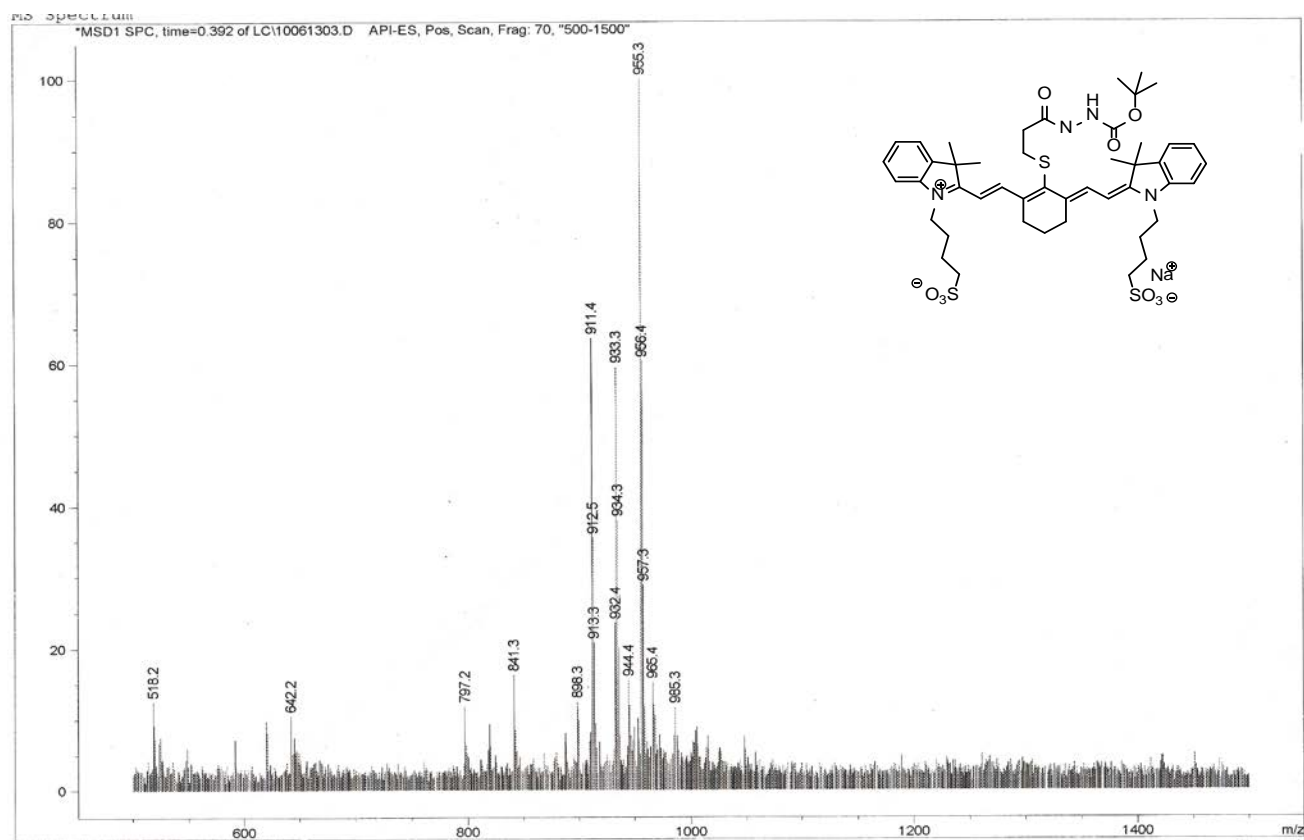

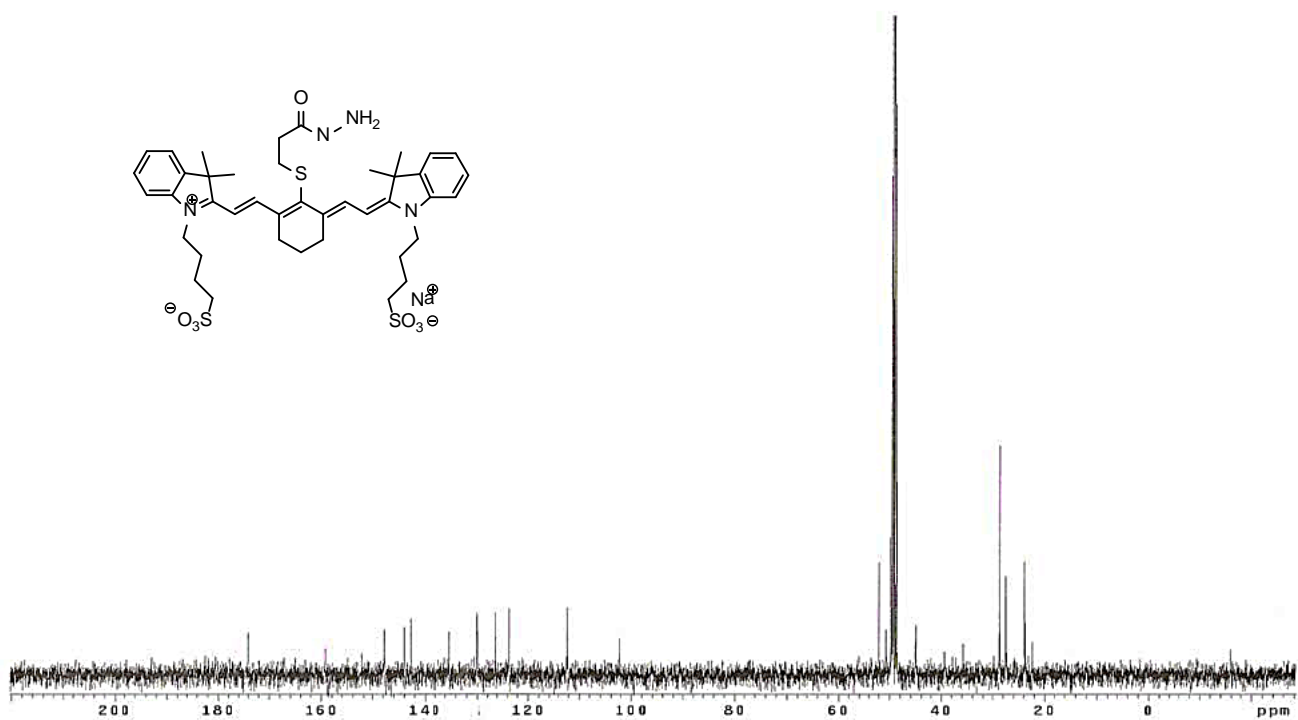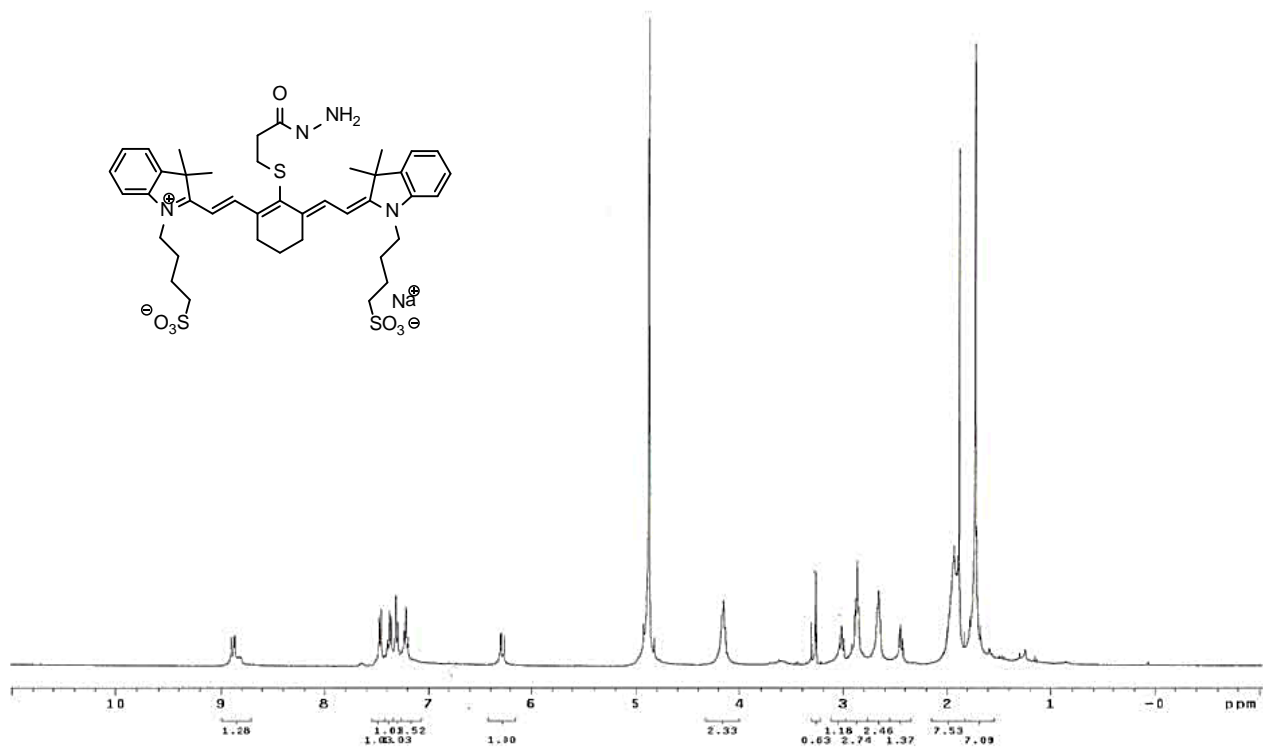

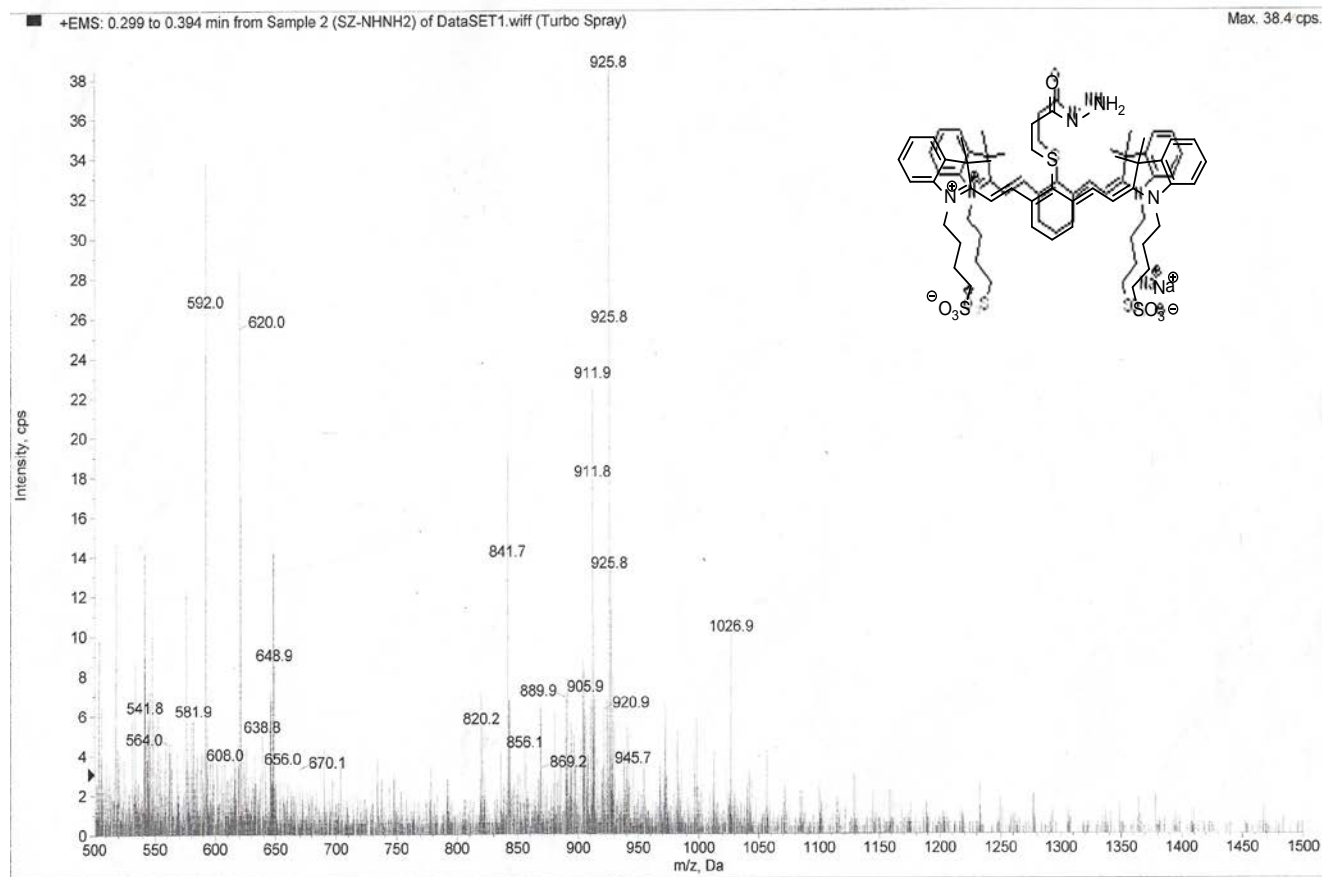

Supplement: c2jm33990k.pdf [file c2jm33990k.pdf]
